# Supplementary material for: Mapping Long-Term Functional Changes in Cerebral Blood Flow by Arterial Spin Labeling
Source: PLOS journal article supplement (doi:10.1371/journal.pone.0164112), 2016-10-05
Supplement: S1 (10.1371/journal.pone.0164112.s001) [file journal.pone.0164112.s001]

## Supporting Information

### Mapping Long-Term Functional Changes in Cerebral Blood Flow by Arterial Spin Labeling

Tracy Ssali<sup>1,2\*</sup>, Udunna C Anazodo<sup>1,2</sup>, Yves Bureau<sup>1</sup>, Bradley J MacIntosh<sup>3</sup>, Matthias Günther<sup>4,5</sup>, Keith St Lawrence<sup>1,2</sup>

<sup>1</sup>Lawson Health Research Institute, London, ON, Canada.

<sup>2</sup>Department of Medical Biophysics, Western University, London, ON, Canada.

<sup>3</sup>Sunnybrook Health Sciences Centre, Toronto, ON, Canada.

<sup>4</sup>Fraunhofer Institute for Medical Image Computing MEVIS, Bremen, Germany

<sup>5</sup>Mediri GmbH, Heidelberg, Germany

\* **Corresponding author:** Tracy Ssali, Electronic mail: [tssali@uwo.ca](mailto:tssali@uwo.ca).

#### A. Data Acquisition

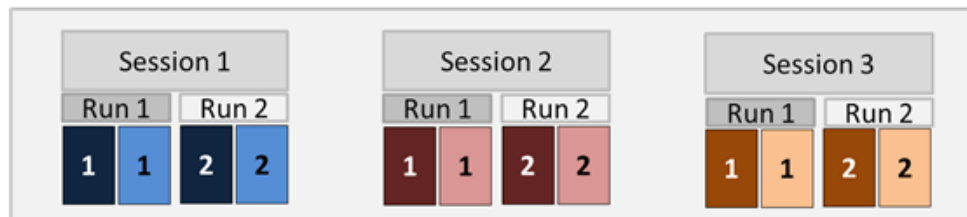

#### B. Data Analysis

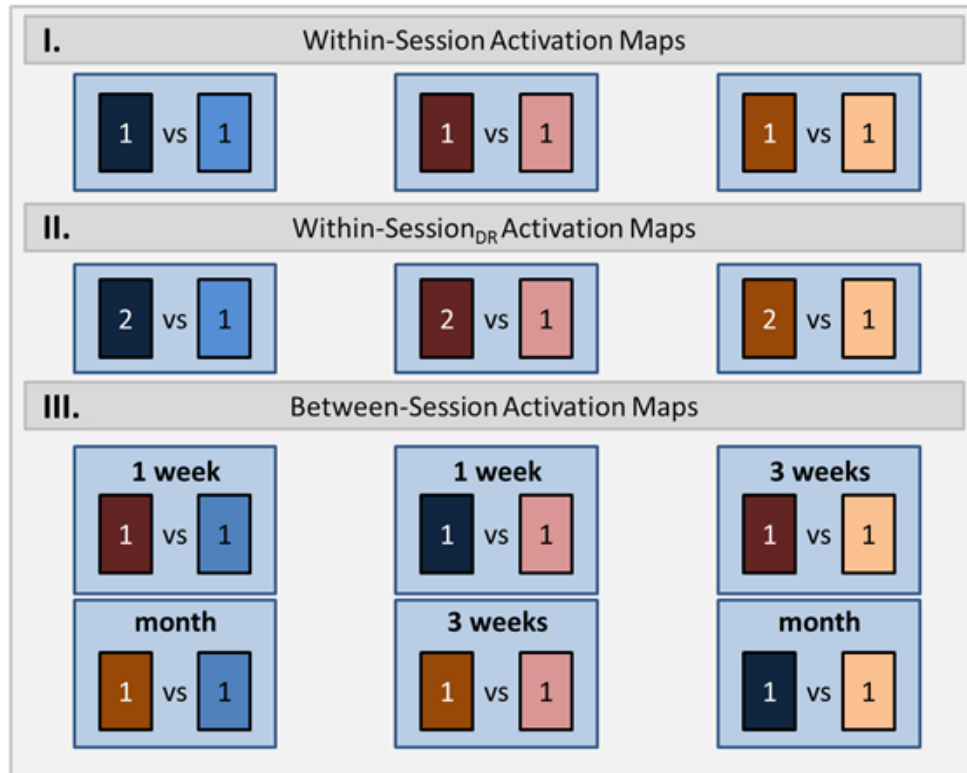

**Fig A.** Pictorial representation of: (A) data acquisition and (B) data analysis. Data were acquired in 3 sessions, where blue red and orange represent sessions 1 through 3 respectively. Each session consisted of two runs, where each run was comprised of a ~5 minute resting period (indicated by darker shade) and a ~5 minute sequential finger tapping task period (indicated by the lighter shaded colour).

Contrasts were generated by concatenating task data with rest:

- (I.) Within-session
  - a. ex. Session 1 Run 1 Rest vs. Session 1 Run 1 Task
- (II.) within-session different run (within-session<sub>DR</sub>)
  - a. ex. Session 1 **Run 2** Rest vs. Session 1 **Run 1** Task
- (III.) between-sessions
  - a. ex. 1 week: **Session 2** Run 1 Rest vs. **Session 1** Run 1 Task
  - b. ex. 1 month: **Session 3** Run 1 rest vs. **Session 1** Run 1 Task)

For precision and dice analysis, activation data generated using the same task data were compared to each other (i.e down each column). That is to say, the task data remained the same while the rest data was within-session, within-session<sub>DR</sub> or between-session. The precision and dice coefficients were then averaged together based on the separation between rest and task. A similar analysis was performed for run 2 data.

**Table A.** Background suppression timing used for ASL and ATT mapping sequences.

|            | Post<br>Labeling Delay | Inversion<br>Pulse 1 (ms) | Inversion<br>Pulse 2 (ms) |
|------------|------------------------|---------------------------|---------------------------|
| <u>ASL</u> |                        |                           |                           |
|            | 1200                   | 372                       | 956                       |
| <u>ATT</u> |                        |                           |                           |
|            | 700                    | 198                       | 543                       |
|            | 1300                   | 410                       | 1041                      |
|            | 1900                   | 666                       | 1563                      |
|            | 2500                   | 965                       | 2102                      |
|            | 3100                   | 1310                      | 2657                      |

**Table B.** Precision measured using the activated region defined by the family wise error rate (FWE), false discovery rate (FDR), or an anatomically defined motor region (AAL) as the true positive region. Between-session precision is expressed relative to within-session<sub>DR</sub> precision.

|                | aCBF     |          |          | rCBF     |          |          |
|----------------|----------|----------|----------|----------|----------|----------|
|                | FWE      | FDR      | AAL      | FWE      | FDR      | AAL      |
| <b>Week</b>    | 74 ± 13% | 69 ± 13% | 78 ± 14% | 84 ± 11% | 76 ± 11% | 87 ± 9%  |
| <b>3 Weeks</b> | 84 ± 19% | 84 ± 27% | 87 ± 12% | 88 ± 20% | 84 ± 19% | 91 ± 19% |
| <b>Month</b>   | 75 ± 17% | 73 ± 27% | 80 ± 11% | 84 ± 17% | 82 ± 12% | 85 ± 12% |

**Table C.** Between-session Dice coefficients relative to within-session<sub>DR</sub> measured with FWE and FDR statistical thresholds.

|                | <b>aCBF</b> |            | <b>rCBF</b> |            |
|----------------|-------------|------------|-------------|------------|
|                | <b>FWE</b>  | <b>FDR</b> | <b>FWE</b>  | <b>FDR</b> |
| <b>Week</b>    | 74 ± 33%    | 71 ± 48%   | 88 ± 12%    | 83 ± 13%   |
| <b>3 Weeks</b> | 79 ± 32%    | 82 ± 54%   | 90 ± 18%    | 87 ± 15%   |
| <b>Month</b>   | 69 ± 30%    | 69 ± 50%   | 87 ± 16%    | 87 ± 15%   |
